# Supplementary material
Source: PubMed Central journal article supplement (PMC1783405)
Supplement: pnas_0604666104_4.pdf [file pnas_0604666104_4.pdf]

**Table 3. Fits of soil nutrient vectors onto NMDS ordinations for the BCI 50-ha plot, the La Planada 25-ha plot, and the Yasuni 25-ha plot**

| Soil variable    | <u>BCI</u> |         | <u>La Planada</u> |        | <u>Yasuni</u> |        |
|------------------|------------|---------|-------------------|--------|---------------|--------|
|                  | $r^2$      | P       | $r^2$             | P      | $r^2$         | P      |
| Al               | 0.376      | < 0.001 | 0.212             | <0.001 | 0.475         | <0.001 |
| B                | 0.562      | < 0.001 | -                 | -      | -             | -      |
| Ca               | 0.569      | < 0.001 | 0.585             | <0.001 | 0.613         | <0.001 |
| Cu               | 0.472      | < 0.001 | 0.217             | <0.001 | 0.306         | <0.001 |
| Fe               | 0.467      | < 0.001 | 0.602             | <0.001 | 0.265         | <0.001 |
| K                | 0.631      | < 0.001 | 0.658             | <0.001 | 0.151         | 0.003  |
| Mg               | 0.474      | < 0.001 | 0.618             | <0.001 | 0.535         | <0.001 |
| Mn               | 0.318      | < 0.001 | 0.158             | 0.001  | 0.158         | 0.001  |
| P                | 0.440      | < 0.001 | 0.616             | <0.001 | 0.332         | <0.001 |
| Zn               | 0.693      | < 0.001 | 0.361             | <0.001 | 0.302         | <0.001 |
| N                | 0.382      | < 0.001 | 0.564             | <0.001 | 0.290         | <0.001 |
| N <sub>min</sub> | 0.615      | < 0.001 | 0.112             | 0.008  | 0.058         | 0.227  |

Species compositions in 50 × 50 m quadrats were subjected to unconstrained NMDS ordinations in four dimensions, and soil nutrient vectors were fitted to NMDS axis 1 scores such that the projection of points onto vectors have maximum correlations with the corresponding soil variables. N<sub>min</sub>, N mineralization rate. Species with mean densities of <1 tree per ha were not included in the ordinations.
