# Supplementary material
Source: PubMed Central journal article supplement (PMC1783405)
Supplement: pnas_0604666104_5.pdf [file pnas_0604666104_5.pdf]

**Table 4. Pearson correlations between pairs of soil nutrients measured at 300 sample points in the 50-ha plot at BCI, Panama**

|                        | <b>Al</b> | <b>B</b> | <b>Ca</b> | <b>Cu</b> | <b>Fe</b> | <b>K</b> | <b>Mg</b> | <b>Mn</b> | <b>P</b> | <b>Zn</b> | <b>N</b> | <b>N<sub>min</sub></b> |
|------------------------|-----------|----------|-----------|-----------|-----------|----------|-----------|-----------|----------|-----------|----------|------------------------|
| <b>Al</b>              | 1.000     | -0.264   | -0.262    | 0.120     | 0.181     | -0.177   | -0.241    | 0.132     | 0.263    | -0.198    | -0.202   | -0.142                 |
| <b>B</b>               | -0.264    | 1.000    | 0.840     | 0.640     | 0.342     | 0.709    | 0.741     | 0.566     | 0.230    | 0.720     | 0.425    | 0.160                  |
| <b>Ca</b>              | -0.262    | 0.840    | 1.000     | 0.654     | 0.460     | 0.721    | 0.840     | 0.541     | 0.186    | 0.733     | 0.370    | 0.246                  |
| <b>Cu</b>              | 0.120     | 0.640    | 0.654     | 1.000     | 0.571     | 0.619    | 0.488     | 0.719     | 0.045    | 0.572     | 0.182    | 0.116                  |
| <b>Fe</b>              | 0.181     | 0.342    | 0.460     | 0.571     | 1.000     | 0.408    | 0.428     | 0.484     | 0.096    | 0.410     | 0.112    | 0.189                  |
| <b>K</b>               | -0.177    | 0.709    | 0.721     | 0.619     | 0.408     | 1.000    | 0.676     | 0.485     | 0.151    | 0.571     | 0.299    | 0.252                  |
| <b>Mg</b>              | -0.241    | 0.741    | 0.840     | 0.488     | 0.428     | 0.676    | 1.000     | 0.407     | 0.198    | 0.721     | 0.374    | 0.213                  |
| <b>Mn</b>              | 0.132     | 0.566    | 0.541     | 0.719     | 0.484     | 0.485    | 0.407     | 1.000     | -0.073   | 0.482     | 0.168    | 0.064                  |
| <b>P</b>               | 0.263     | 0.230    | 0.186     | 0.045     | 0.096     | 0.151    | 0.198     | -0.073    | 1.000    | 0.273     | 0.350    | 0.062                  |
| <b>Zn</b>              | -0.198    | 0.720    | 0.733     | 0.572     | 0.410     | 0.571    | 0.721     | 0.482     | 0.273    | 1.000     | 0.347    | 0.223                  |
| <b>N</b>               | -0.202    | 0.425    | 0.370     | 0.182     | 0.112     | 0.299    | 0.374     | 0.168     | 0.350    | 0.347     | 1.000    | -0.129                 |
| <b>N<sub>min</sub></b> | -0.142    | 0.160    | 0.246     | 0.116     | 0.189     | 0.252    | 0.213     | 0.064     | 0.062    | 0.223     | -0.129   | 1.000                  |
