# Supplementary material
Source: PubMed Central journal article supplement (PMC1783405)
Supplement: pnas_0604666104_6.pdf [file pnas_0604666104_6.pdf]

**Table 5. Pearson correlations between pairs of soil nutrients measured at 253**

**sample points in the 25-ha plot at La Planada, Colombia**

|                        | <b>Al</b> | <b>Ca</b> | <b>Cu</b> | <b>Fe</b> | <b>K</b> | <b>Mg</b> | <b>Mn</b> | <b>P</b> | <b>Zn</b> | <b>N</b> | <b>N<sub>min</sub></b> |
|------------------------|-----------|-----------|-----------|-----------|----------|-----------|-----------|----------|-----------|----------|------------------------|
| <b>Al</b>              | 1.000     | -0.142    | -0.089    | -0.268    | 0.010    | -0.160    | -0.146    | -0.120   | -0.083    | 0.234    | -0.057                 |
| <b>Ca</b>              | -0.142    | 1.000     | 0.397     | 0.324     | 0.613    | 0.805     | 0.305     | 0.446    | 0.671     | 0.353    | -0.089                 |
| <b>Cu</b>              | -0.089    | 0.397     | 1.000     | 0.336     | 0.440    | 0.473     | 0.215     | 0.578    | 0.473     | 0.337    | -0.082                 |
| <b>Fe</b>              | -0.268    | 0.324     | 0.336     | 1.000     | 0.454    | 0.375     | -0.040    | 0.472    | 0.212     | 0.282    | 0.066                  |
| <b>K</b>               | 0.010     | 0.613     | 0.440     | 0.454     | 1.000    | 0.660     | 0.218     | 0.687    | 0.587     | 0.595    | -0.032                 |
| <b>Mg</b>              | -0.160    | 0.805     | 0.473     | 0.375     | 0.660    | 1.000     | 0.287     | 0.524    | 0.650     | 0.378    | -0.009                 |
| <b>Mn</b>              | -0.146    | 0.305     | 0.215     | -0.040    | 0.218    | 0.287     | 1.000     | 0.103    | 0.377     | 0.077    | -0.035                 |
| <b>P</b>               | -0.120    | 0.446     | 0.578     | 0.472     | 0.687    | 0.524     | 0.103     | 1.000    | 0.455     | 0.452    | -0.005                 |
| <b>Zn</b>              | -0.083    | 0.671     | 0.473     | 0.212     | 0.587    | 0.650     | 0.377     | 0.455    | 1.000     | 0.402    | -0.050                 |
| <b>N</b>               | 0.234     | 0.353     | 0.337     | 0.282     | 0.595    | 0.378     | 0.077     | 0.452    | 0.402     | 1.000    | -0.296                 |
| <b>N<sub>min</sub></b> | -0.057    | -0.089    | -0.082    | 0.066     | -0.032   | -0.009    | -0.035    | -0.005   | -0.050    | -0.296   | 1.000                  |
