# Supplementary material
Source: PubMed Central journal article supplement (PMC1783405)
Supplement: pnas_0604666104_7.pdf [file pnas_0604666104_7.pdf]

**Table 6. Pearson correlations between pairs of soil nutrients measured at 300 sample points in the 50-ha plot at Yasuni, Ecuador**

|                        | <b>Al</b> | <b>Ca</b> | <b>Cu</b> | <b>Fe</b> | <b>K</b> | <b>Mg</b> | <b>Mn</b> | <b>P</b> | <b>Zn</b> | <b>N</b> | <b>N<sub>min</sub></b> |
|------------------------|-----------|-----------|-----------|-----------|----------|-----------|-----------|----------|-----------|----------|------------------------|
| <b>Al</b>              | 1.000     | -0.259    | 0.163     | -0.032    | -0.140   | -0.080    | -0.152    | -0.335   | 0.018     | 0.108    | 0.175                  |
| <b>Ca</b>              | -0.259    | 1.000     | 0.357     | 0.076     | 0.350    | 0.690     | 0.010     | 0.059    | 0.524     | 0.061    | -0.116                 |
| <b>Cu</b>              | 0.163     | 0.357     | 1.000     | 0.493     | 0.225    | 0.350     | 0.137     | -0.274   | 0.573     | 0.195    | -0.041                 |
| <b>Fe</b>              | -0.032    | 0.076     | 0.493     | 1.000     | -0.143   | 0.052     | 0.185     | -0.217   | 0.262     | 0.153    | -0.001                 |
| <b>K</b>               | -0.140    | 0.350     | 0.225     | -0.143    | 1.000    | 0.282     | 0.351     | 0.166    | 0.168     | 0.079    | -0.201                 |
| <b>Mg</b>              | -0.080    | 0.690     | 0.350     | 0.052     | 0.282    | 1.000     | 0.026     | -0.054   | 0.368     | 0.047    | -0.080                 |
| <b>Mn</b>              | -0.152    | 0.010     | 0.137     | 0.185     | 0.351    | 0.026     | 1.000     | 0.219    | 0.065     | 0.125    | -0.195                 |
| <b>P</b>               | -0.335    | 0.059     | -0.274    | -0.217    | 0.166    | -0.054    | 0.219     | 1.000    | -0.019    | -0.149   | -0.022                 |
| <b>Zn</b>              | 0.018     | 0.524     | 0.573     | 0.262     | 0.168    | 0.368     | 0.065     | -0.019   | 1.000     | 0.239    | -0.079                 |
| <b>N</b>               | 0.108     | 0.061     | 0.195     | 0.153     | 0.079    | 0.047     | 0.125     | -0.149   | 0.239     | 1.000    | -0.299                 |
| <b>N<sub>min</sub></b> | 0.175     | -0.116    | -0.041    | -0.001    | -0.201   | -0.080    | -0.195    | -0.022   | -0.079    | -0.299   | 1.000                  |
