# Supplementary material
Source: PubMed Central journal article supplement (PMC1783405)
Supplement: pnas_0604666104_8.pdf [file pnas_0604666104_8.pdf]

**Table 7. Kendall correlation coefficients of soil nutrients and topographic variables in the BCI, La Planada, and Yasuni Forest Dynamics Plots**

| Soil variable    | <u>BCI</u>    |        | <u>La Planada</u> |        | <u>Yasuni</u> |               |
|------------------|---------------|--------|-------------------|--------|---------------|---------------|
|                  | Elevation     | Slope  | Elevation         | Slope  | Elevation     | Slope         |
| Al               | 0.171         | -0.306 | -0.264            | 0.091  | 0.237         | 0.206         |
| Ca               | -0.117        | 0.257  | -0.111            | -0.202 | -0.121        | -0.040        |
| Cu               | <b>-0.015</b> | 0.240  | 0.130             | -0.059 | <b>-0.021</b> | <b>-0.006</b> |
| Fe               | -0.148        | 0.171  | 0.127             | -0.216 | -0.081        | -0.147        |
| K                | -0.063        | 0.273  | <b>-0.034</b>     | -0.149 | 0.084         | 0.072         |
| Mg               | -0.149        | 0.219  | <b>-0.020</b>     | -0.189 | 0.047         | 0.095         |
| Mn               | <b>-0.001</b> | 0.127  | 0.308             | -0.114 | -0.107        | -0.151        |
| P                | 0.337         | -0.308 | <b>0.041</b>      | -0.228 | -0.135        | -0.130        |
| Zn               | <b>0.008</b>  | 0.180  | -0.075            | -0.113 | 0.060         | 0.038         |
| N                | 0.344         | 0.082  | <b>-0.037</b>     | -0.118 | 0.083         | 0.038         |
| N <sub>min</sub> | -0.070        | 0.153  | 0.104             | -0.120 | 0.109         | 0.085         |

Block averages of soil nutrients in 20 × 20 m quadrats were correlated with mean elevation and slope of these quadrats. All correlations except those indicated in bold were statistically significant ( $P < 0.05$ ), but the correlations were usually weak as indicated by the numbers in the table.
