# Supplementary material
Source: PubMed Central journal article supplement (PMC1783405)
Supplement: pnas_0604666104_9.pdf [file pnas_0604666104_9.pdf]

**Table 8. Variogram model fit parameters for soil properties for the BCI 50-ha plot**

| <b>Soil variable</b> | <b>Lambda</b> | <b>Trend order</b> | <b>Model</b> | <b>Nugget</b> | <b>Partial sill</b> | <b>Effective range (m)</b> |
|----------------------|---------------|--------------------|--------------|---------------|---------------------|----------------------------|
| Al                   | 1.0           | 2                  | Exponential  | 10801.7       | 68415.3             | 155.0                      |
| B                    | 0.5           | 2                  | Exponential  | 0.04053       | 0.3649              | 100.0                      |
| Ca                   | 0.5           | 2                  | Exponential  | 21.29         | 425.6               | 56.5                       |
| Cu                   | 1.0           | 2                  | Exponential  | 0.9552        | 4.54                | 179.1                      |
| Fe                   | 0.5           | 2                  | Exponential  | 2.95          | 15.83               | 146.6                      |
| K                    | 0.0           | 2                  | Exponential  | 0.0875        | 0.2193              | 78.5                       |
| Mg                   | 0.5           | 2                  | Exponential  | 5.73          | 64.27               | 85.2                       |
| Mn                   | 0.5           | 2                  | Exponential  | 2.846         | 133.5               | 212.8                      |
| P                    | 0.5           | 2                  | Exponential  | 0.4556        | 1.471               | 204.5                      |
| Zn                   | 0.5           | 2                  | Exponential  | 0.00662       | 2.135               | 33.3                       |
| N                    | 0.0           | 2                  | Spherical    | 0.0754        | 0.0986              | 239.5                      |
| N <sub>min</sub>     | 0.5           | 1                  | Spherical    | 6.23          | 2.192               | 141.1                      |
| pH                   | 1.0           | 2                  | Exponential  | 0.0172        | 0.1403              | 220.7                      |

The measured data values were first transformed by using Box–Cox transformation, and then a polynomial trend surface regression was fitted. The residuals from the trend surface regression were used to compute empirical variograms, to which variogram models were fitted. Lambda is the Box–Cox parameter. Trend order is the order of the polynomial regression. Effective range for the exponential variogram model is estimated at three times the fitted range, because the variogram approaches the sill only asymptotically.
