# Supplementary material
Source: PubMed Central journal article supplement (PMC1783405)
Supplement: pnas_0604666104_10.pdf [file pnas_0604666104_10.pdf]

**Table 9. Variogram model fit parameters for soil properties for the La Planada 25-ha plot**

| <b>Soil variable</b> | <b>Lambda</b> | <b>Trend order</b> | <b>Model</b> | <b>Nugget</b> | <b>Partial sill</b> | <b>Effective range (m)</b> |
|----------------------|---------------|--------------------|--------------|---------------|---------------------|----------------------------|
| Al                   | 0.5           | 2                  | -            | -             | -                   | -                          |
| Ca                   | 0.0           | 1                  | -            | -             | -                   | -                          |
| Cu                   | 0.5           | 2                  | Spherical    | 0.2186        | 0.1801              | 57.0                       |
| Fe                   | 0.0           | 2                  | Spherical    | 0.1698        | 0.2203              | 49.5                       |
| K                    | 0.0           | 1                  | Spherical    | 0.0861        | 0.0483              | 97.7                       |
| Mg                   | 0.0           | 1                  | -            | -             | -                   | -                          |
| Mn                   | 0.0           | 2                  | Spherical    | 3.0333        | 13.7642             | 159.5                      |
| P                    | 0.5           | 2                  | Spherical    | 3.9675        | 4.6586              | 59.5                       |
| Zn                   | 0.5           | 2                  | -            | -             | -                   | -                          |
| N                    | 0.0           | 1                  | -            | -             | -                   | -                          |
| N <sub>min</sub>     | 0.5           | 2                  | -            | -             | -                   | -                          |
| pH                   | 1.0           | 1                  | Exponential  | 0.0307        | 0.1041              | 155.8                      |

For some soil variables, valid variogram models could not be fitted because of high variability at small distances (<10 m). In these cases, we simply carried out an inverse distance weighted interpolation, which means that the weights were inversely proportional to the squared distance to the prediction location. All other details are given in the legend to Table 8.
