# Supplementary material
Source: PubMed Central journal article supplement (PMC1783405)

BCI

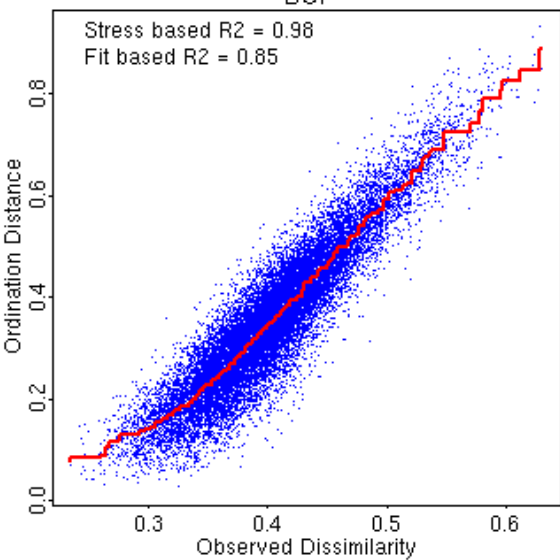

Yasuni

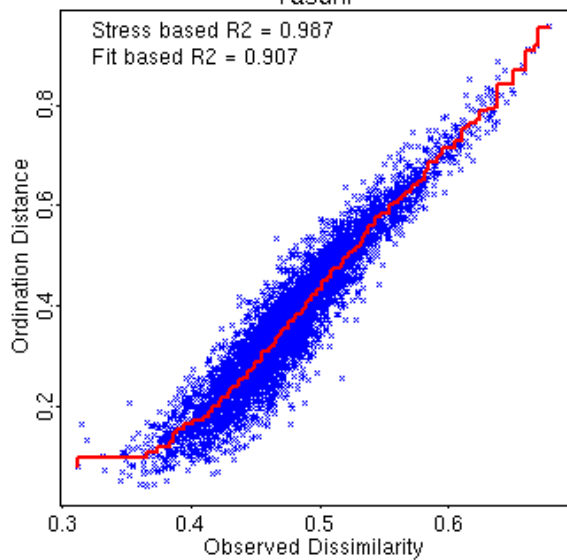

La Planada

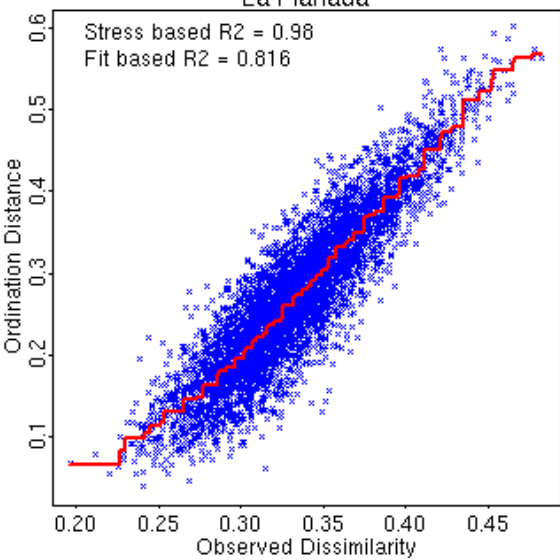

Supplement: pnas_0604666104_1.pdf [file pnas_0604666104_1.pdf]

BCI

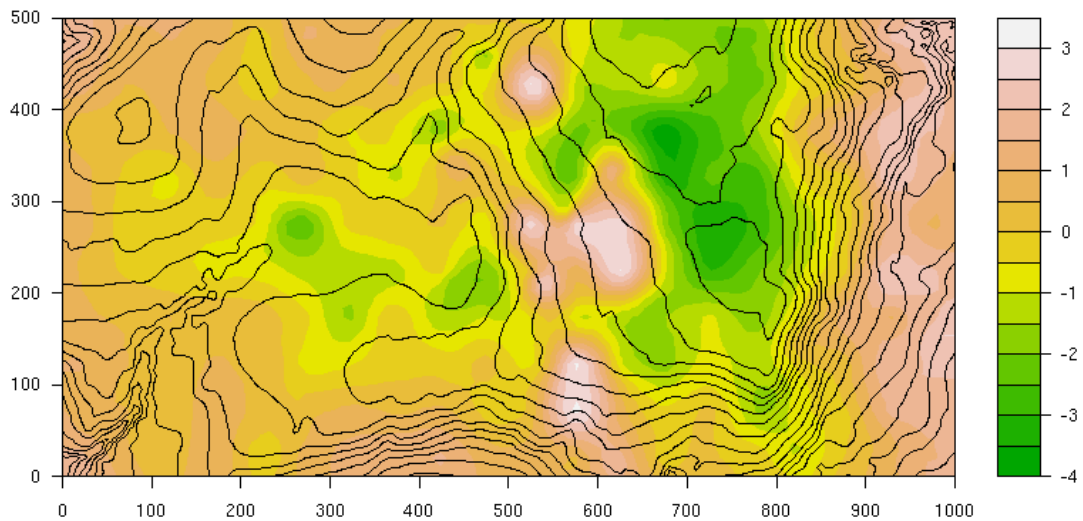

La Planada

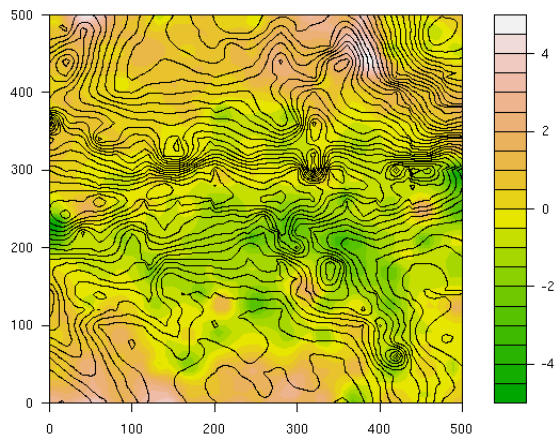

Yasuni

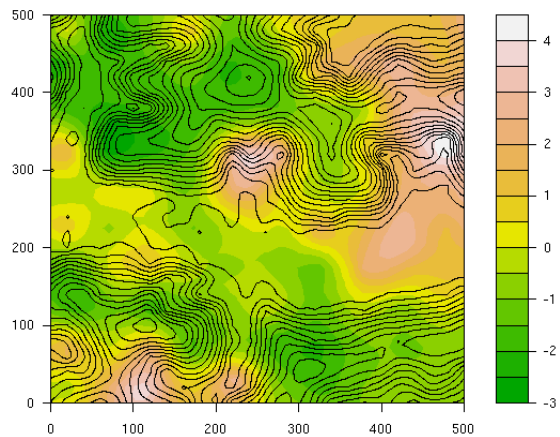

Supplement: pnas_0604666104_2.pdf [file pnas_0604666104_2.pdf]

BCI

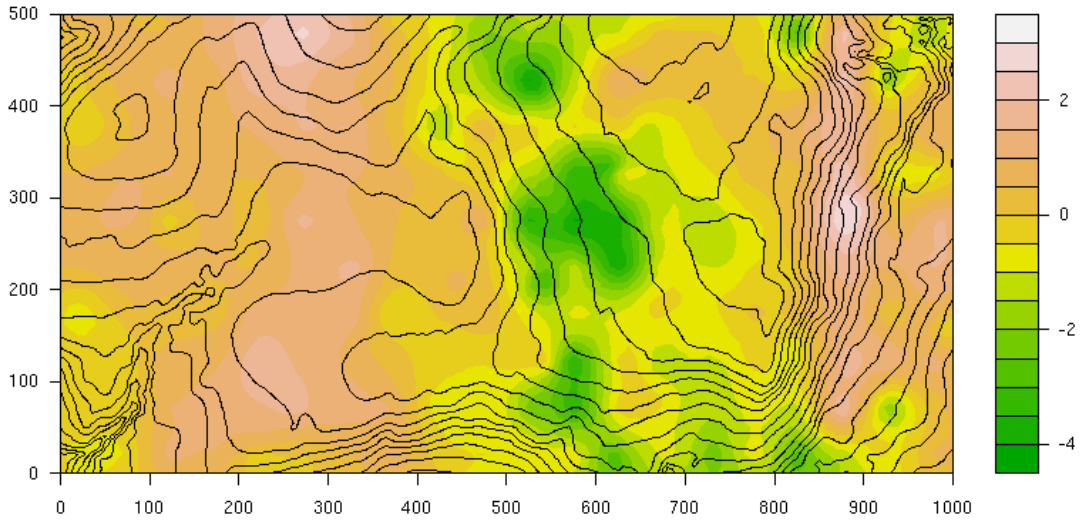

La Planada

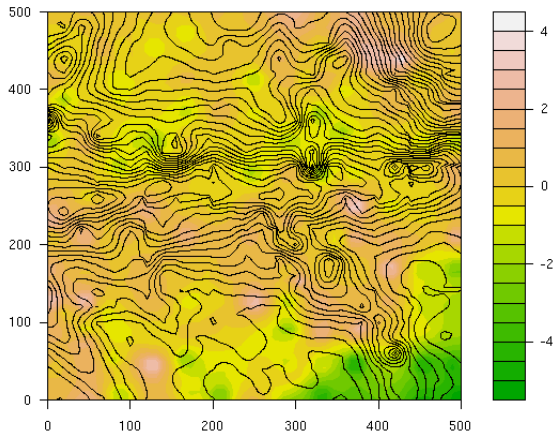

Yasuni

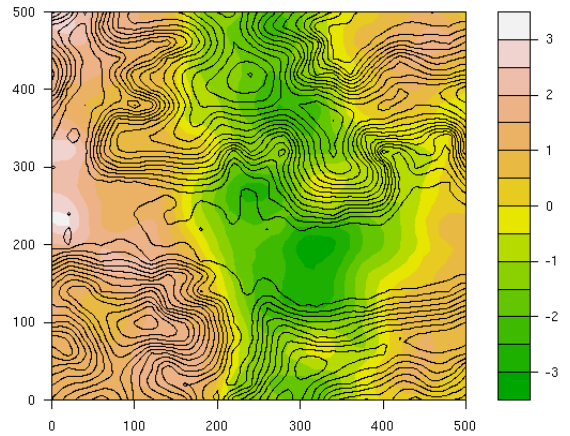

Supplement: pnas_0604666104_3.pdf [file pnas_0604666104_3.pdf]
